# Supplementary material for: An advanced PdNPs@MoS2 nanocomposite for efficient oxygen evolution reaction in alkaline media
Source: Royal Society of Chemistry journal article supplement (doi:10.1039/d3ra04738e), 2023-01-01
Supplement: d3ra04738e1.pdf [file d3ra04738e1.pdf]

## Supporting Information

### **An advanced PdNPs@MoS<sub>2</sub> nanocomposite for efficient oxygen evolution reaction in alkaline media**

Umair Aftab<sup>a</sup>, Muhammad Yameen Solangi<sup>a</sup>, Aneela Tahira<sup>b</sup>, Abdul Hanan<sup>d</sup>, Muhammad Ishaq Abro<sup>a</sup>, Amal Karsy<sup>h</sup>, Elmuez Dawi<sup>i</sup>, Muhammad Ali Bhatti<sup>j</sup>, Ayman Nafady<sup>g</sup>, Alessandro Gradone<sup>f</sup>, Raffaello Mazzaro<sup>f,l</sup>, Vittorio Morandi<sup>f</sup>, Antonia Infantes-Molin<sup>e</sup>, Zafar Hussain Ibupoto<sup>c</sup>

<sup>a</sup>Department of Metallurgy and Materials Engineering, Mehran University of Engineering and Technology, 76080, Jamshoro, Pakistan.

<sup>b</sup>Institute of Chemistry, Shah Abdul Latif University Khairpur Mirs, Sindh, Pakistan.

<sup>c</sup>Dr. M.A Kazi Institute of Chemistry University of Sindh Jamshoro, 76080, Sindh Pakistan.

<sup>d</sup>Key Laboratory of Superlight Material and Surface Technology, Ministry of Education, College of Materials Science and Chemical Engineering, Harbin Engineering University, 150001, Harbin, PR China.

<sup>e</sup>Department of Inorganic Chemistry, Crystallography and Mineralogy. (Unidad Asociada al ICP-CSIC), Faculty of Sciences, University of Malaga, Campus de Teatinos, 29071, Malaga, Spain.

<sup>f</sup>Department of Science and Technology, CNR IMM, Bologna, Italy.

<sup>g</sup>Department of Chemistry, College of Science, King Saud University, Riyadh, 11451, Saudi Arabia.

<sup>h</sup>Nanotechnology Research Centre (NTRC), The British University in Egypt (BUE), Cairo, Egypt.

<sup>i</sup>Nonlinear Dynamics Research Center (NDRC), Ajman University, Ajman, P.O. Box 346, United Arab Emirates.

<sup>j</sup>Institute of Environmental Sciences, University of Sindh Jamshoro, Jamshoro, 76080, Sindh, Pakistan

*\*Corresponding authors: Zafar Hussain Ibupoto, Email: [zaffar.ibhupoto@usindh.edu.pk](mailto:zaffar.ibhupoto@usindh.edu.pk)*

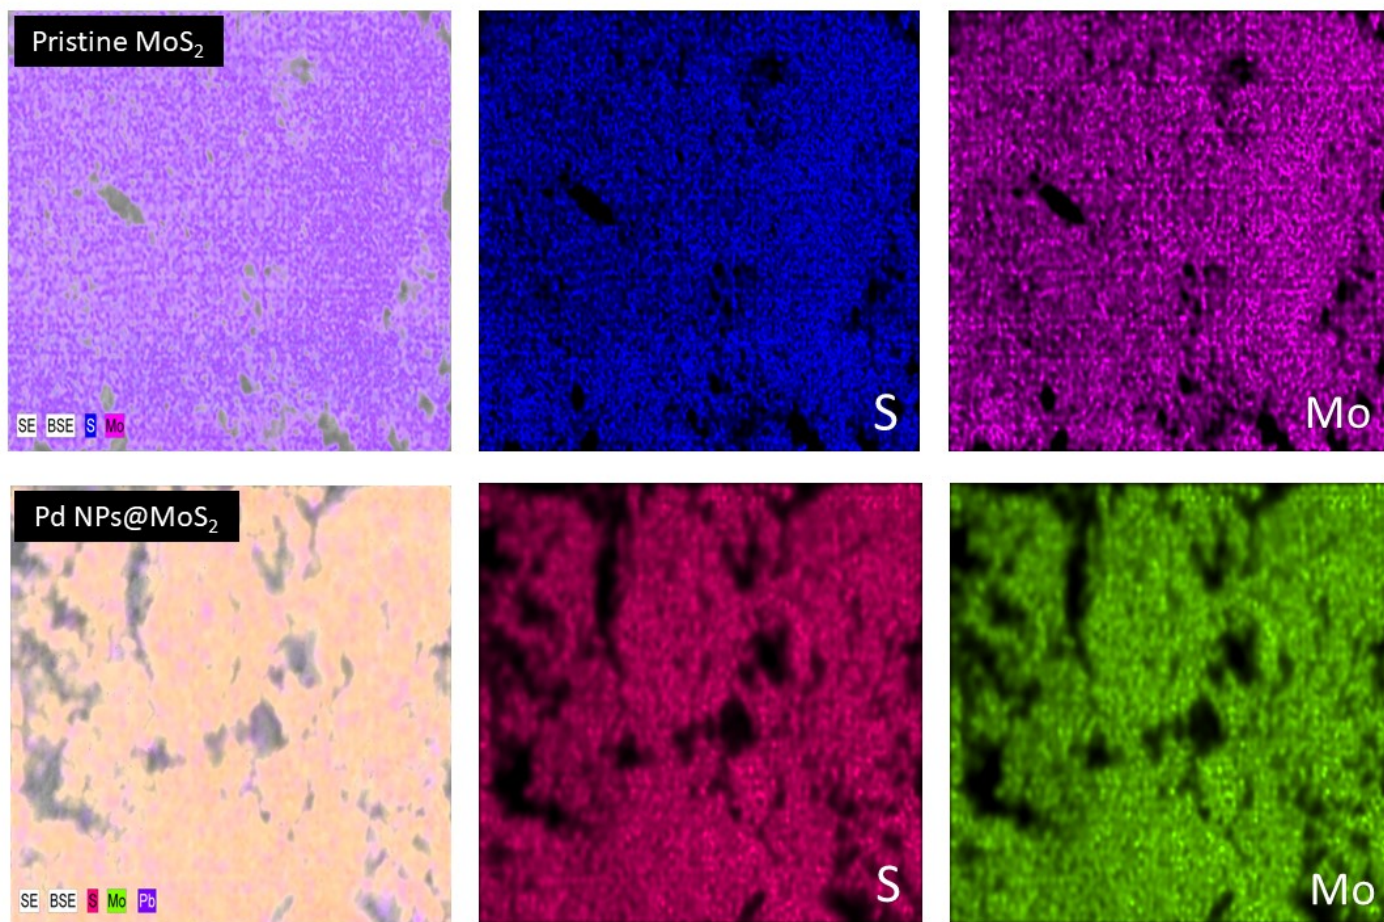

**Fig S1:** EDS Mapping of MoS<sub>2</sub> Pristine and Pd doped sample.

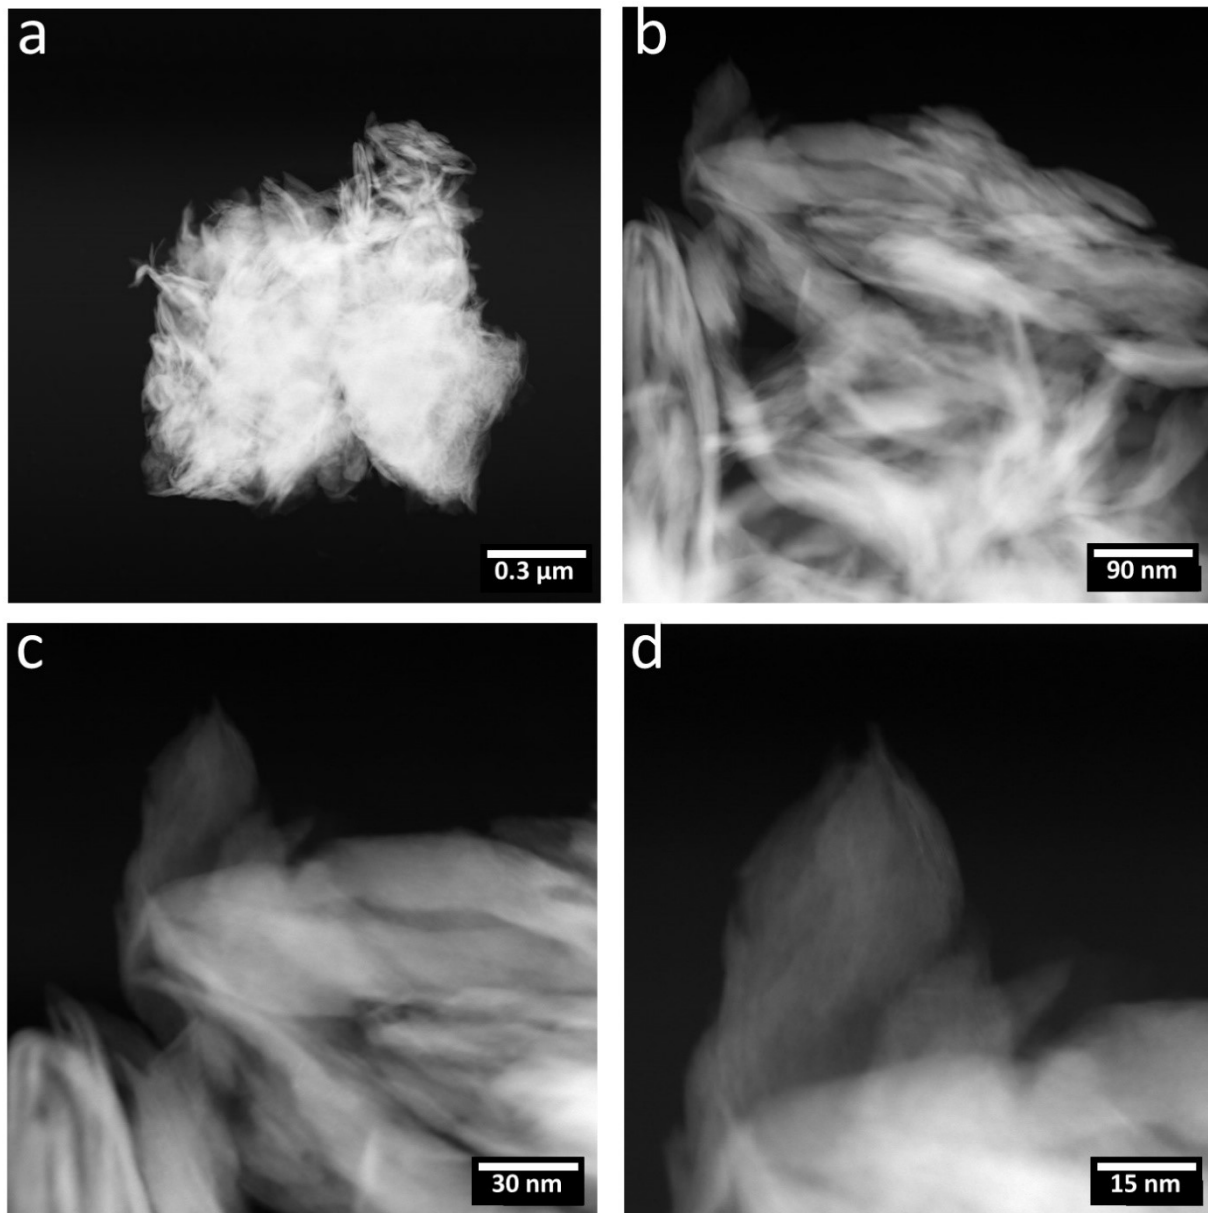

**Fig S2:** HAADF – STEM micrographs at different magnifications of MoS<sub>2</sub> pristine.

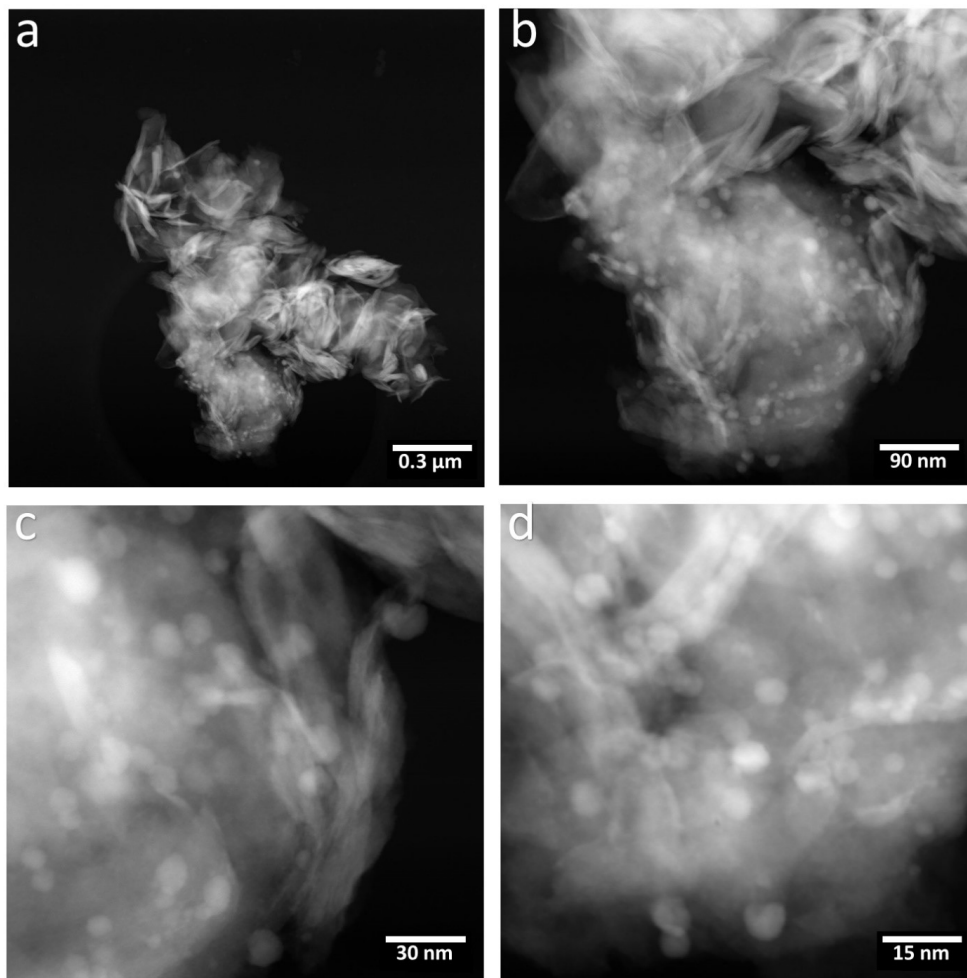

Comment [UdMO]: Please use always the same name. In this case PdNPs@MoS<sub>2</sub> was used.

Fig S3: HAADF – STEM micrographs at different magnifications of Pd doped sample.

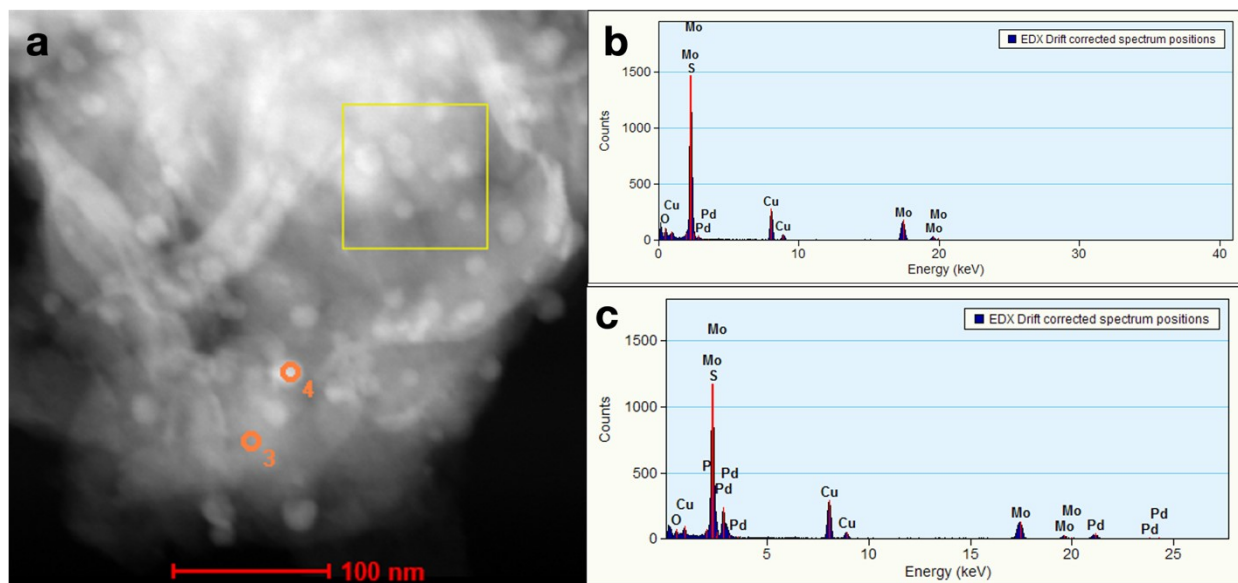

**Fig S4.** PdNPs@MoS<sub>2</sub> sample a) STEM-HAADF micrograph. b,c) EDS position analysis of the spot 3 (b) and spot 4 (c), highlighted in the STEM image.

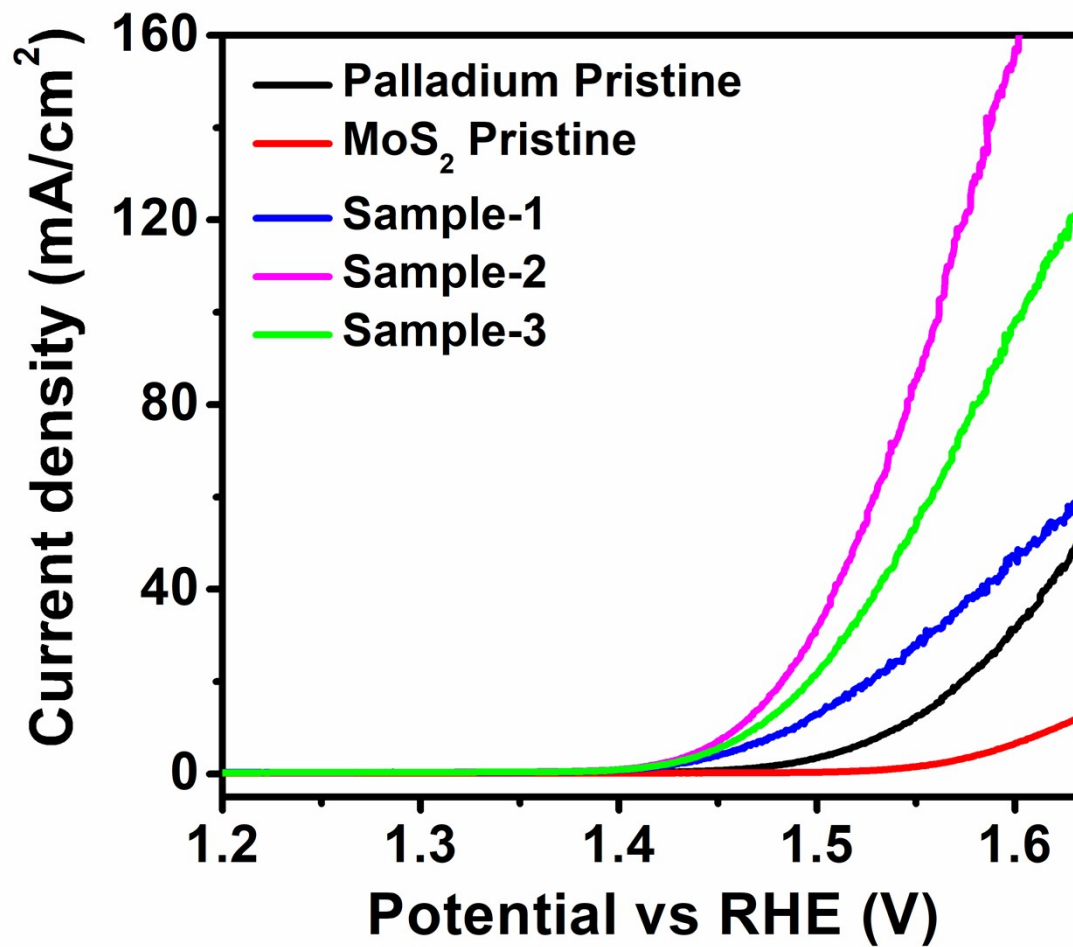

**Fig S5.** Polarization curve of different catalyst containing high concentration of Pd (Sample-3)

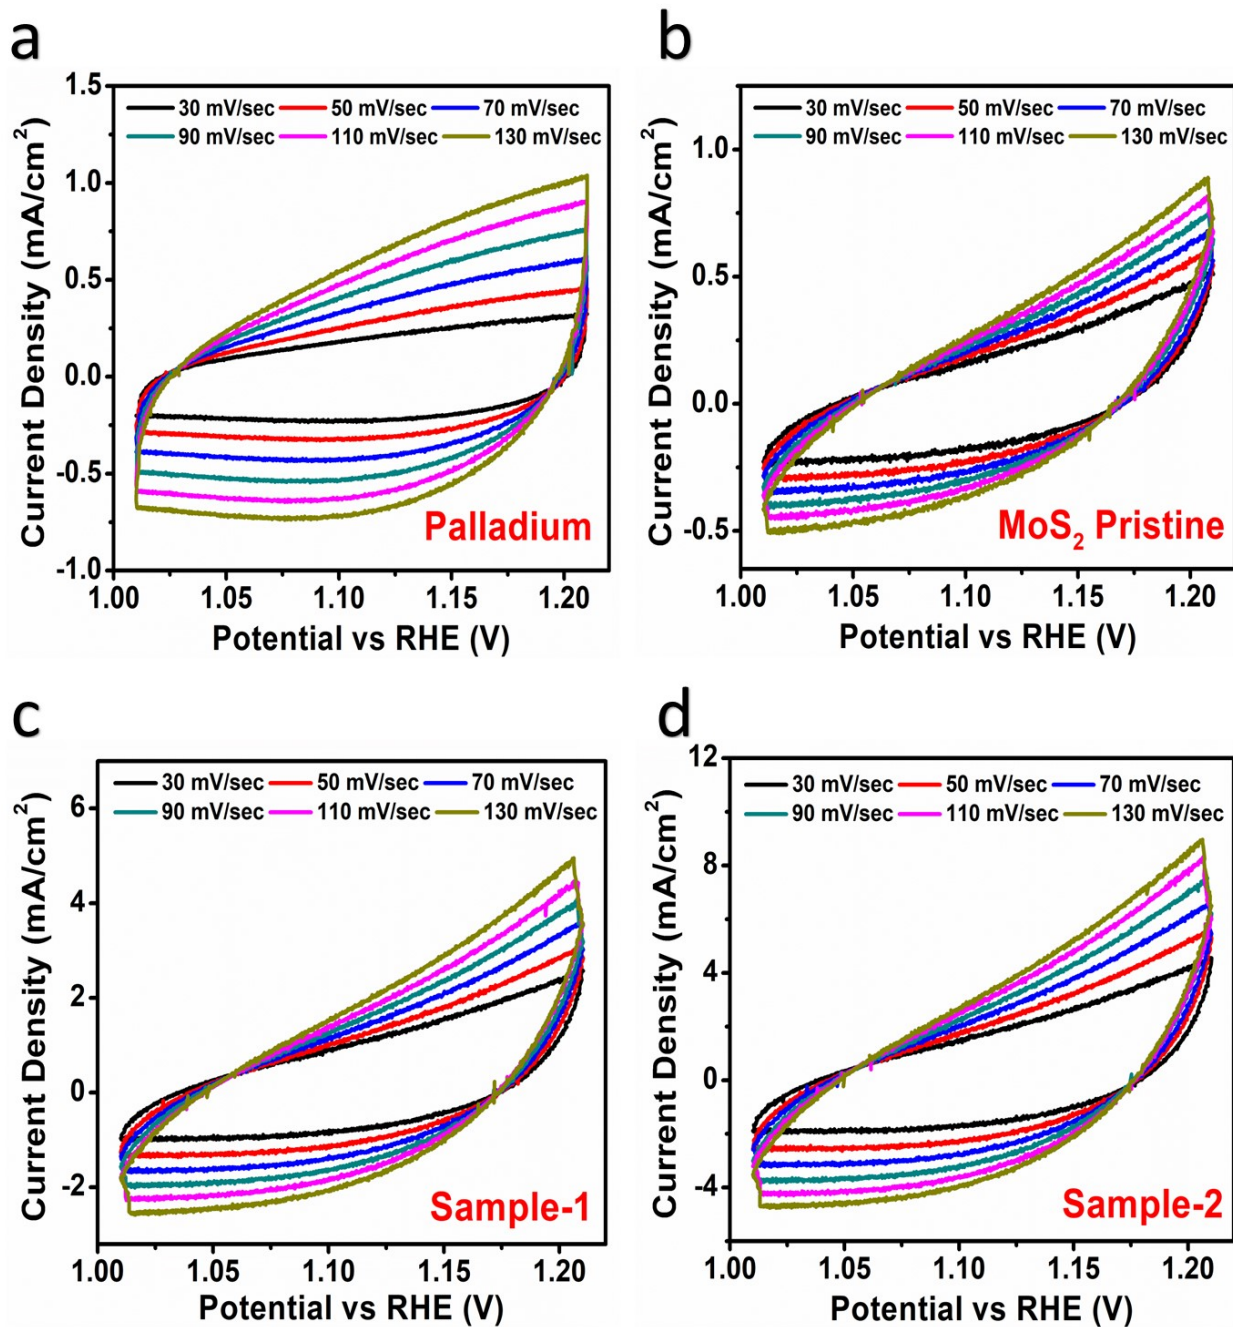

**Fig S6:** CV curves at various scan rates of (a) Palladium Pristine, (b) MoS<sub>2</sub> Pristine, (c, d) Sample-1 & Sample-2 for the determination of double layer capacitance.
